# Supplementary material for: Fas apoptotic inhibitor molecule 2 mitigates metabolic dysfunction-associated fatty liver disease through autophagic CRTC2 degradation
Source: Research Square preprint supplement (doi:10.21203/rs.3.rs-6110029/v1), 2025-03-24
Supplement: Supplementary file 1 [file c0faa0a41d7f19f0e9ee15fe.docx]

**Fas apoptotic inhibitor molecule 2 mitigates metabolic dysfunction-associated fatty liver disease through** **autophagic CRTC2 degradation**

**Supplementary Materials and Methods**

**Animal models.** Faim2-knockout mice were purchased from Gempharmatech (Jiangsu, China). 8- to 10-week-old male mice (20-25 g) were maintained in a standard environment with a 12-h light–dark cycle. The fatty liver model was established in mice by feeding them a high fat (protein, 20%; fat, 45%; carbohydrates, 35%; Medicience, MD12032, China) for 24 weeks or high-fat and high-cholesterol (protein, 14%; fat, 42%; carbohydrates, 44%, 2% cholesterol; trophic, IMA2019001, China) for 16 weeks. Mice that were administered a normal chow diet (protein, 18%; fat, 10%; carbohydrates, 72%; Xietong Shengwu, 1010086, China) served as controls. To over-expression FAIM2, the 2*1011vg AAV8 in 100mL phosphate buffered saline (PBS) was injected via tail vein to Wide type mice or FAIM2-KO mice, the vector as a control.

**Human liver grouping and exclusion criteria.** Simple steatosis and MASH were independently diagnosed using standard histological criteria by two pathologists in a blinded fashion, as follows: samples with a NAS of 1–2, ballooning scores of 0 and no fibrosis were classified as those with simple steatosis; samples with a NAS ≥ 5 or a NAS of 3–4 but with fibrosis were included in the MASH group; samples with a NAS of 0 were classified as non-steatotic. Patients with liver steatosis resulting from excessive alcohol consumption, from drug or toxin use or from viral infection (for example, hepatitis B virus (HBV) and hepatitis C virus (HCV) infection) were excluded from the study.

**Tolerance tests**. We carried out glocose tolerance test on mice that had been fasted for 6 h. After determining the fasting blood glucose levels, we intraperitoneally injected each animal with glucose (1 g glucose per kg body weight; A6E0152, baxter, USA). Blood glucose levels were measured after 15, 30, 60 and 120 min.

**Serum lipid and Liver enzyme assay**. The lipid content including triglycerid, total cholestrol, low density lipoprotein cholestrole and liver function which evaluated based on the alanine transaminase (ALT) and aspartate aminotransferase (AST) contents in the serum, were examined using a Hitachi automatic biochemical analyzer (HITACHI, HITACHI3110, Japan) according to the manufacturer's instructions.

**Immunohistochemistry**. Immunohistochemistry analyses were performed using paraffin-embedded sections of tissue samples. After antigen retrieval processing, the mouse liver tissue sections were washed with a 3% hydrogen peroxide solution at room temperature for 20 min. Subsequently, the sections were incubated with 10% bovine serum albumin at 37°C for 30 min. Then, the FAIM2 primary antibody (dilution ratio 1:50, Santa Cruz Biotechnology, sc-398737, USA) was added to the sections and incubated overnight at 4°C. Following this, the sections were rinsed with phosphate-buffered saline (PBS) and treated with a goat anti-mouse detection kit (Biolight, BLRE006-200T, China) at 37°C for 1 h. After washing with PBS, positive signals on the sections were observed using a diaminobenzidine working solution (ZSGB-BIO, ZLI-9018, China). The sections were then stained with hematoxylin (Servicebio, G1004, China) and washed with deionized water. Finally, the sections were sealed with resin mounting medium (Baso, BA-7004, China), and images were captured using an ordinary light microscope (Leica, Aperio Versa 200, Germang).

**Histological analyses**. Liver sections were embedded in paraffin and then stained with H&E to visualize the pattern of lipid accumulation and the inflammatory status. Lipid droplet accumulation was visualized using Oil Red O (Sigma-Aldrich, #O0625, USA) staining of frozen liver sections that were prepared in Tissue-Tek OCT compound. Liver fibrosis was assessed via picrosirius red (PSR; Hede Biotechnology Co., Ltd., #26357-02, China) staining. The histological features of the tissues were observed and imaged under a light microscope (Olympus, CX43, Japan).

**Primary hepatocyte cell isolation and adenovirus infection**. Wild-type or FAIM2 hepatocyte-knockout mice underwent anesthesia before exposing their livers. After the tissues were perfused and digested by liver perfusion medium (Thermo Fisher Scientific, 17701-038, USA) and liver digestion medium (Thermo Fisher Scientific, 17701-034, USA) respectively, digestion was stopped when diffuse hepatic parenchyma was observed. The liver was then excised, minced, and filtered through a 70-μm cell strainer (Falcon, #352350, USA). The filtrate was placed in a centrifuge and spun at 50 g for 5 min. The supernatant was removed and the cells were resuspended in complete medium. The number of viable cells was then counted, and finally, the cells were plated. In subsequent experiments, the primary hepatocytes were infected with an appropriate adenovirus at a multiplicity of infection (MOI) of 30 virus particles per cell for 6 h.

**Cell lines**. HEK293T cells were purchased from the Type Culture Collection of the Chinese Academy of Sciences, Shanghai, China. Mycoplasma contamination was checked, and the results were negative. The HEK293T were verified by short tandem-repeat DNA profiling before the study.

**Plasmid Constructs**. Plasmids encoding human FAIM2 (NM_012306.4) were obtained by cloning the cDNA encoding FAIM2 into the pHAGE-Flag, pcDNA5-Flag and pcDNA5-GST-HA vectors, respectively. The sequences encoding mutant FAIM2 (1-311aa, 101-311aa, 100-316aa, ▲LIR) were cloned into the pcDNA5 vector. The full-length region of human CRTC2 (NM_181715.3) was cloned into pHAGE-HA, pHAGE-Flag or pcDNA5-GST-HA vector separately. The plasmids encoding mutant CRTC2 (1-144aa, 143-320aa, 316-693aa) were constructed by cloning the indicated coding regions into the pcDNA5-HA vector. The primers used for plasmid construction are listed in Table S1.

**Adenoviral Vector Construction**. To overexpress mouse FAIM2 (NM_028224.4), the entire coding region of the mouse FAIM2 gene was placed into a replication-defective adenoviral vector under the control of the cytomegalovirus promoter. The entire coding region of the mouse FAIM2-▲N and CRTC2 (NM_028881.4) was placed into a replication-defective adenoviral vector too. To knock down mouse CRTC2 expression, three mouse CRTC2-specific short hairpin RNA (shRNA)-squenes were used to construct AdshCRTC2 adenoviruses. AdGFP or AdshRNA were used as controls. Recombinant adenoviruses were generated using the AdEasy vector kit (Stratagene, La Jolla, USA). Plasmids were recombined with the pAdEasy backbone vector, according to the manufacturer's instructions, and transfected into HEK293T cells using FuGENE transfection reagent (Roche, E2312, Switzerland). Recombinant adenoviruses were plaque-purified, titered to 109 plaque-forming units per ml and verified via restriction digestion. AdPlus-mCherry-GFP-LC3B (AdGFP-RFP-LC3B) was purchased from Beyotime (Beyotime, C3012-1Ml, China). The primers used for adenoviral vector construction are listed in Table S1.

**qPCR**. For qPCR assays, total RNA was extracted from mouse liver tissue or primary hepatocytes using TRIzol reagent (15596-026, Invitrogen, USA). The mRNA was then reverse transcribed into cDNA using HiScript III RT SuperMix (Vazyme, R323-01, China). Following this, the expression of target genes was quantified by using ChamQ SYBR qPCR Master Mix (Vazyme, Q311-02, China) and the LightCycler480 II instrument (Roche, Switzerland) under standard conditions. β-Actin serves as the reference gene, and the primer sequences for the target genes are listed in Table S2.

**RNA-Seq and Data Processing**. For the RNA-Seq assay, cDNA libraries were constructed, and single-end libraries were sequenced by MD2000. HISAT2 software (version 2.21, USA) was used to align clean reads to Ensembl mouse (mm10 or GRCm38) genomes. Then, SAMtools (version 1.4, China) was stored and used to convert the aligned reads to Binary Alignment Map (BAM) format. Transcripts Per Kilobase of exonmodel per Million mapped reads (TPM) and read counts of each identified gene were calculated by StringTie (version 1.3.3b, USA). Subsequently, read counts were input into DESeq2 to calculate differential gene expression and the statistical significance.

**Western blot analysis**. The samples of liver tissue and cells were lysed using an SDS lysis buffer containing protease inhibitors (50 mM Tris-HCl pH 6.8, 2% SDS, 10% glycerol, 0.1 M DTT) to obtain total protein. Protein concentration was then determined using a BCA Protein Assay Kit (Thermo Fisher Scientific, 23225, USA). Subsequently, SDS-PAGE electrophoresis was performed to separate equal amounts of protein within the gel. The separated proteins were transferred onto a PVDF membrane (Millipore, IPVH00010, USA), which was then blocked for 1 h with a solution of 5% skimmed milk in TBST (Tris-buffered saline and 0.1% Tween-20). The PVDF membrane was incubated overnight at 4°C with the corresponding primary antibody, followed by incubation for 1 h at room temperature with the appropriate secondary antibody. Finally, the PVDF membrane containing the target protein was incubated with an enhanced chemiluminescence reagent (Bio-Rad, 170-5061, China), and detection was carried out using a ChemiDoc MP Imaging System (Bio-Rad, USA). Protein grayscale quantification was performed using Image J software. β-Actin served as a control, and detailed information on all used antibodies can be found in Table S3.

**Immunofluorescence staining**. To study protein interactions, primary hepatocytes were incubated with FAIM2 (Santa Cruz Biotechnology, sc-398737, diluted 1:50, USA) or CRTC2 (Proteintech, Illinois, 12497-1-AP, China), LAMP1(Cell Signaling Technology, 15665, USA). In brief, after 12 h of PAOA (PA:OA = 0.5:1 mM) stimulation, primary hepatocytes are fixed for 30 min with 4% paraformaldehyde solution (Servicebio, G1101-500ML, China). Subsequently, the hepatocytes were washed with phosphate-buffered saline and then permeabilized with 0.2% Triton X-100 (Sigma-Aldrich, T8787, USA) for 5 min. They were then blocked at 37°C with 8% goat serum (Abbkine, BMS0050, China). Next, the hepatocytes on slides were incubated with the corresponding antibodies, followed by treatment with fluorescent secondary antibodies of the appropriate species (Thermo Fisher Scientific Alexa Fluor, 1:200 dilution, USA). Finally, images were acquired using a confocal fluorescence microscope (Leica, LCS-SP8-STED, Gremang).

**Neil Red staining**. Primary hepatocytes were stimulated with PAOA and then washed with PBS solution. Subsequently, they were fixed at room temperature for 30 min with a 4% formaldehyde solution (Servicebio, G1101-500ML, China). The cells were then incubated with Nile red solution at room temperature for 10 min, followed by three washes with PBS. Afterward, the cells were mounted with DAPI (Beyotime, P0131-5mL, China) and imaged using a confocal fluorescence microscope (Leica, LCS-SP8-STED, Gremang).

Total triglyceride detection: The total triglyceride assay was performed using a Triglyceride Assay Kit (Nanjing Jiancheng, A110-1-1, China) according to the manufacturer's protocol. After treatment, the cells were lysed with 1% Triton X-100 solution (Beyotime, P0096-100mL, China). A portion of the lysate was mixed with the assay working solution, and the absorbance was measured. Another portion of the lysate was centrifuged, and the supernatant was collected to determine protein concentration. The triglyceride content was calculated using the formula provided by the manufacturer.

**Immunoprecipitation (IP) assay**. After indicated plasmids co-transfected HEK293T cells (China Center For Type Culture Collection, GDC0187) and corresponding adenoviruses infected PHC, cells were treated with cold IP lysis buffer (20 mM Tris HCl, pH 7.4; 150 mM NaCl; 1 mM EDTA; and 1% Triton X-100) containing protease inhibitor (Roche, 04693132001, Switzerland) and phosphatase inhibitor (Roche, 4906837001, Switzerland). Samples were centrifuged at 4°C for 10 min and a small part of supernatant was boiled with 4× SDS Lysis Buffer as Whole cell lysis (WCL), and the rest supernatant containing protein was incubated with protein G Bestarose 4FF beads (Bestchrom, AA104307, China) and indicated labeled antibody overnight at 4°C. Finally, the beads were washed with cold IP buffer containing 150 mM or 300 mM NaCl for three times respectively. Then the beads were boiled in 2x SDS loading buffer at 95°C for 10 min prior to western blotting analysis. To conduct IP-mass spectrometry analysis, the precipitated proteins were separated by SDS-PAGE gels and then delivered to Shang Hai Bioprofile Technology for detection.

**Glutathione-S-transferase (GST) precipitation assays**. Lysis of HEK293T cells transfected with indicated plasmids was obtained with lysis buffer (50 mM Na2HPO4, 300 mM NaCl, 1% Triton) containing protease inhibitor cocktail tablets (Roche, 04693132001, Switzerland) and purified by Glutathione Sepharose 4B beads (GE Healthcare, 45-000-139, China), Flag antibodies and Flag peptide (Sigma-Aldrich, F4799, USA). Purified GST-HA tagged protein was incubated with Glutathione Sepharose 4B beads for 3 h at 4°C and washed by cold GST buffer (20 mM Tris-HCl pH 6.8, 150 mM NaCl, 0.2% TritonX-100) for three times, before mixed with purified Flag tagged protein for overnight at 4°C. The beads were washed by cold GST buffer for three times and western blotting analysis was conducted after precipitated proteins boiled in 2x SDS loading buffer at 95°C for 10 min.

**LC3B fluorescence assays**. Primary hepatocytes were infected with GFP-RFP-LC3B adenovirus and stimulated with PAOA, followed by washing with PBS solution. They were then fixed at room temperature for 30 min with a 4% formaldehyde solution (Servicebio, G1101-500ML, China). After another PBS wash, the cells were mounted with glycerin solution and imaged using confocal microscopy to observe fluorescence changes.

**Table S1** Primer sequence for construction of plasmids and adenovirus

| Gene name |  | Primers |
| --- | --- | --- |
| Flag-FAIM2 | Forward primer: | TCGGGTTTAAACGGATCCGCCACCATGACCCAGGGAAAGCTCTCC |
| Reverse primer: | GGGCCCTCTAGACTCGAGTTCTCGGTTAGTGCCAAAAAGCTGC |
| Flag-m-FAIM2 | Forward primer: | TCGGGTTTAAACGGATCCATGACCCAGGGAAAGCTCTCT |
| Reverse primer: | GGGCCCTCTAGACTCGAGTTCCCGGTTGGTGCCAAAAAGC |
| GST-HA- FAIM2 | Forward primer: | TCGGGTTTAAACGGATCCGCCACCATGACCCAGGGAAAGCTCTCC |
| Reverse primer: | GGGCCCTCTAGACTCGAGTTCTCGGTTAGTGCCAAAAAGCTGC |
| Flag-FAIM2(1-311) | Reverse primer: | TCGGGTTTAAACGGATCCATGACCCAGGGAAAGCT |
| Reverse primer: | GGGCCCTCTAGACTCGAGTCAAAAAAGCTGCAGGAAGAAGG |
| Flag-FAIM2(101-311) | Forward primer: | TCGGGTTTAAACGGATCCATGGTCTTTGTCAGAAAGGTC |
| Reverse primer: | GGGCCCTCTAGACTCGAGTCAAAAAAGCTGCAGGAAGAAG |
| Flag-FAIM2(100-316) | Forward primer: | TCGGGTTTAAACGGATCCATGGTCTTTGTCAGAAAGGTCTACACC |
| Reverse primer: | GGGCCCTCTAGACTCGAGTCATTCTCGGTTAGTGCCAAAAAG |
| Flag-FAIM2(▲LIR) | Forward primer: | GGTGCCTCTCCACCCTAGCGACCCCAGCAGCAGCTCC |
| Reverse primer: | GCTAGGGTGGAGAGGCACC |
| Flag- CRTC2 | Forward primer: | TCGGGTTTAAACGGATCCATGGCGACGTCGGGGG |
| Reverse primer: | GGGCCCTCTAGACTCGAGTCATTGGAGCCGGTCACT |
| HA-CRTC2 | Forward primer: | TCGGGTTTAAACGGATCCATGGCGACGTCGGGGG |
| Reverse primer: | GGGCCCTCTAGACTCGAGTCATTGGAGCCGGTCACT |
| GST-HA-CRTC2 | Forward primer: | TCGGGTTTAAACGGATCCATGGCGACGTCGGGGG |
| Reverse primer: | GGGCCCTCTAGACTCGAGTCATTGGAGCCGGTCACT |
| HA-CRTC2(1-144) | Forward primer: | TCGGGTTTAAACGGATCCGCCACCATGGCGACGTCGGGGGC |
| Reverse primer: | GGGCCCTCTAGACTCGAGCTATCGCCAGCTAGACTCTGGG |
| HA-CRTC2(143-320) | Forward primer: | TCGGGTTTAAACGGATCCGCCACCATGTGGCGAAGGACGATGGC |
| Reverse primer: | GGGCCCTCTAGACTCGAGCTAGCTGATGCCCAGGTGAG |
| HA-CRTC2(316-693) | Forward primer: | TCGGGTTTAAACGGATCCGCCACCATGCACCTGGGCATCAGC |
| Reverse primer: | GGGCCCTCTAGACTCGAGTCATTGGAGCCGGTCACTGCG |
| Flag-m-FAIM2(▲LIR) | Forward primer: | CTGTGCCACTCCATCCAAGCGACCCCAGCGGCAGC |
| Reverse primer: | GCTTGGATGGAGTGGCACAG |
| Ad-m-FAIM2 | Forward primer: | GCTAGCGATATCGGATCCGCCACCATGACCCAGGGAAAGCTCTCTG |
| Reverse primer: | GTCCTTGTAATCACTAGTTTCCCGGTTGGTGCCAAAAAG |
| Ad-m-FAIM2-▲N | Forward primer: | ACTCACTATAGGGAGACCCAAGCTGGCTAGCGCCACCATGGTCTATACCATCCTATTGGTCCAGCTGCTGGTGACCTTGGCTGTG |
| Reverse primer1: | TCGTCGTCTTTGTAATCCTTGTCATCGTCATCCTTGTAGTCTTCCCGGTTGGTGCCAAAAAGCTGCAG |
| Reverse primer2: | CGAGGCTGATCAGCGGTTTAAACTTAAGCTTTCATTTGTCGTCATCATCCTTATAGTCCTTATCATCGTCGTCTTTGTAATCCT |
| Ad-m-CRTC2 | Forward primer: | TCGGGTTTAAACGGATCCATGGCGACGTCAGGGGCG |
| Reverse primer: | GGGCCCTCTAGACTCGAGTCACTGTAGCCGATCACTACGGAATGAGTCCT |
| Ad-m-shCRTC2 | Sh1 | GACCCATACTATGACCCATTT |
| Sh2 | GAGGACTCATTCCGTAGTGAT |
| Sh3 | GATGCTAAAGTCCCTGCTATT |
| Ad-m-FAIM2(▲LIR) | Forward primer: | TCGGGTTTAAACGGATCCATGACCCAGGGAAAGCTCTCT |
| Reverse primer: | GGGCCCTCTAGACTCGAGTTCCCGGTTGGTGCCAAAAAGC |

**Table S2** Primer sequences for RT-PCR detection

| Gene name | Forward primer | Reverse primer |
| --- | --- | --- |
| *FAIM2* - human | ATGGCCTACCTCACTGGGAT | TGGAAGCTGAAGACGGTGAC |
| *Faim2* - mouse | GGCTGTGGTGGCTCTCTTTA | GGGAAATGTCTCCTGGGTCC |
| *Cd36* - mouse | GACTGGGACCATTGGTGATGA | AAGGCCATCTCTACCATGCC |
| *Fasn* - mouse | TGGGTTCTAGCCAGCAGAGT | ACCACCAGAGACCGTTATGC |
| *Scd1* - mouse | TCTTCCTTATCATTGCCAACACCA | GCGTTGAGCACCAGAGTGTATCG |
| *Pparg* - mouse | ATTCTGGCCCACCAACTTCGG | TGGAAGCCTGATGCTTTATCCCCA |
| *Acaca* - mouse | GGCCAGTGCTATGCTGAGAT | AGGGTCAAGTGCTGCTCCA |
| *Ccl2* - mouse | TACAAGAGGATCACCAGCAGC | ACCTTAGGGCAGATGCAGTT |
| *Cxcl10* - mouse | ATGACGGGCCAGTGAGAATG | ATGATCTCAACACGTGGGCA |
| *Col1a1* - mouse | TGCTAACGTGGTTCGTGACCGT | ACATCTTGAGGTCGCGGCATGT |
| *Col4a1* - mouse | AACAACGTCTGCAACTTCGC | CTTCACAAACCGCACACCTG |
| *Il6*- mouse | TAGTCCTTCCTACCCCAATTTCC | TTGGTCCTTAGCCACTCCTTC |
| *Crtc2* - mouse | TCTCAGGCCTGCTTAGTGC | TTGAATTGCTCCAGATTCCCCA |
| *β-Actin* - mouse | GTGACGTTGACATCCGTAAAGA | GCCGGACTCATCGTACTCC |
| *β-Actin* - human | CATGTACGTTGCTATCCAGGC | CTCCTTAATGTCACGCACGAT |

**Table S3** Antibody for western blotting

| Anbibody | Manufacturer | Catalogue number | Source of species | Dilution |
| --- | --- | --- | --- | --- |
| FAIM2 | santa cruz | sc-398737 | mouse | 1:1000 |
| CRTC2 | proteintech | 12497-1-AP | rabbit | 1:1000 |
| LAMP1 | CST | 15665 | mouse | 1:1000 |
| LC3 | ABclonal | A5618 | rabbit | 1:1000 |
| P62 | ABclonal | A19700 | rabbit | 1:1000 |
| LC3B | CST | 83506 | rabbit | 1:1000 |
| Flag | ABclonal | AE092 | rabbit | 1:200 |
| HA | ABclonal | AE105 | rabbit | 1:200 |
| Flag | MBL | M185-3L | mouse | 1:1000 |
| HA | MBL | M180-3 | mouse | 1:1000 |
| β-Actin | ABclonal | AC026 | mouse | 1:5000 |
